# Supplementary material for: Recombinase Polymerase Amplification Combined with Fluorescence Immunochromatography Assay for On-Site and Ultrasensitive Detection of SARS-CoV-2
Source: MDPI journal article supplement (doi:10.3390/pathogens11111252), 2022-10-28
Supplement: s1 [file s1]

# Supporting Information

## S1 Quantification procedure of RNA templates of SARS-CoV-2 by using digital PCR.

In this work, RNA templates of SARS-CoV-2 were quantified using digital PCR by the following steps.

- (1) Use a lysis reagent to lyse the virus to release the RNA template.
- (2) The lysate was diluted 100 times as the mother solution, followed by 4 times of 2-fold dilution, and the 5 concentrations of the dilution were loaded and tested according to the kit instructions.
- (3) According to the detection results, multiply the pre-dilution factor to obtain the RNA template concentration and take the average as the RNA template concentration in the RPA experiment.

### Reaction Mixes

| Reaction Mix Name | Target Name | Dye        | Channel      | IC     | Reference |
|-------------------|-------------|------------|--------------|--------|-----------|
| XG                | N<br>F1     | Cy5<br>FAM | Red<br>Green | -<br>- | -<br>-    |

### Absolute Quantification (Imaging step 1)

|    | Sample/NTC/Control | Reaction Mix | Target  | IC     | Control Type | Concentration<br>copies/ $\mu$ L | CI<br>(95%)  | Mean concentration<br>copies/ $\mu$ L | CI<br>(95%)    | Partitions<br>valid | positive       | negative       | Threshold      |
|----|--------------------|--------------|---------|--------|--------------|----------------------------------|--------------|---------------------------------------|----------------|---------------------|----------------|----------------|----------------|
| A3 | XG                 | XG           | F1<br>N | -<br>- | -<br>-       | 3882.5<br>3991.6                 | 0.7%<br>0.7% | 1546.3<br>1580.9                      | 84.1%<br>84.6% | 25302<br>25302      | 24315<br>24401 | 987<br>901     | 70.76<br>52.00 |
| B3 | XG                 | XG           | F1<br>N | -<br>- | -<br>-       | 1953.0<br>1991.6                 | 1.0%<br>1.0% | 1546.3<br>1580.9                      | 84.1%<br>84.6% | 25445<br>25445      | 20041<br>20204 | 5404<br>5241   | 70.76<br>52.00 |
| C3 | XG                 | XG           | F1<br>N | -<br>- | -<br>-       | 981.9<br>981.4                   | 1.4%<br>1.4% | 1546.3<br>1580.9                      | 84.1%<br>84.6% | 25432<br>25432      | 13592<br>13587 | 11840<br>11845 | 70.76<br>52.00 |
| D3 | XG                 | XG           | F1<br>N | -<br>- | -<br>-       | 475.6<br>493.9                   | 2.0%<br>2.0% | 1546.3<br>1580.9                      | 84.1%<br>84.6% | 25447<br>25447      | 7824<br>8071   | 17623<br>17376 | 70.76<br>52.00 |
| E3 | XG                 | XG           | F1<br>N | -<br>- | -<br>-       | 237.2<br>238.5                   | 2.9%<br>2.9% | 1546.3<br>1580.9                      | 84.1%<br>84.6% | 25421<br>25421      | 4244<br>4265   | 21177<br>21156 | 70.76<br>52.00 |
| G3 | NTC                | XG           | F1<br>N | -<br>- | -<br>-       | 0.100<br>0.000                   | 168.6%<br>-  | 0.100<br>0.000                        | 168.6%<br>-    | 25448<br>25448      | 2<br>0         | 25446<br>25448 | 70.76<br>52.00 |

**Figure S1. Raw results of Digital PCR** The amplification in each reaction system is a multiplex-PCR. There are two primer probes designed for the ORF1a/b gene (F1) and N gene (N) fragments, and the fluorescent reporter groups are FAM and CY5, respectively. Well A3 is the stock solution after 1000-fold dilution of the RNA template lysate. B3 is the solution of A3 after 2-fold dilution. C3 is the solution of B3 after 2-fold dilution. D3 is the solution of C3 after 2-fold dilution. E3 is the solution of D3 after 2-fold dilution. G3 is no template negative control. The initial RNA template concentrations quantified for ORF1a/b gene and N gene were  $3.86 \times 10^6$  copies/ $\mu$ L and  $3.93 \times 10^6$  copies/ $\mu$ L. The two concentrations are basically the same. For the convenience of calculation,  $4 \times 10^6$  copies/ $\mu$ L. is used as the initial concentration of RNA template.

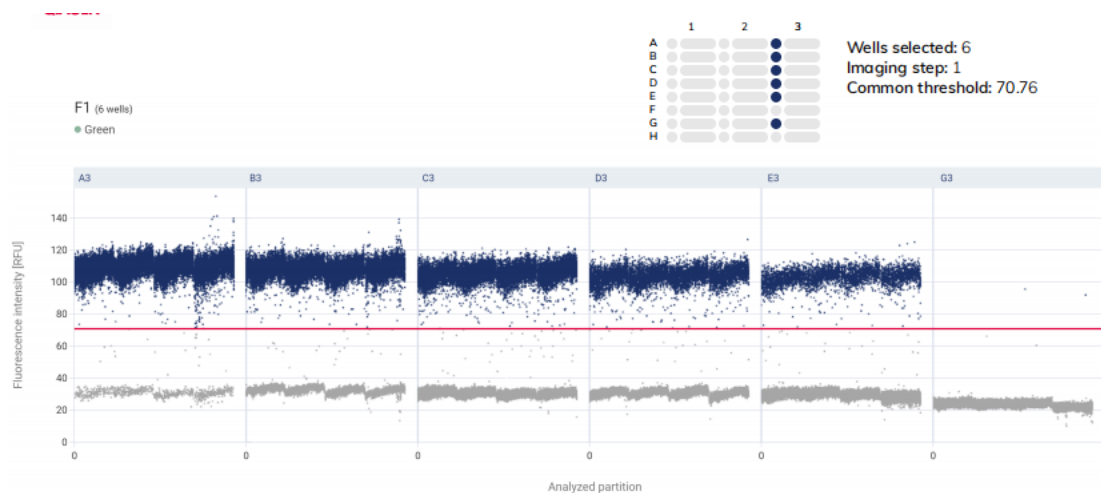

Figure S2. One-dimensional distribution map of each sample well of F1 channel (ORF1a/b gene).

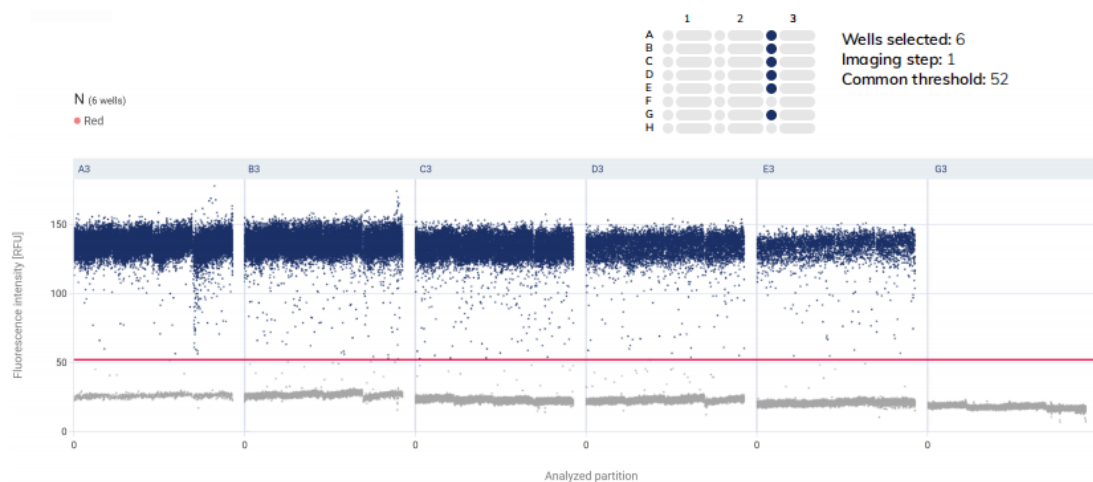

Figure S3. One-dimensional distribution map of each sample well of N channel (N gene).

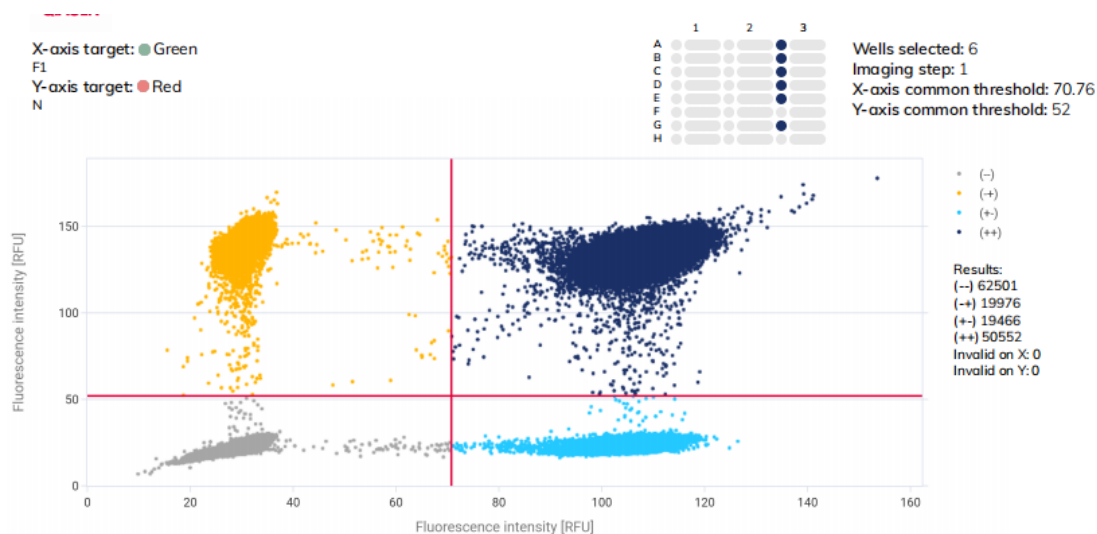

Figure S4. Two-dimensional distribution map of F1 channel (ORF1a/b) and N channel (N gene).
